# Supplementary material for: Chloroplast genome expansion by intron multiplication in the basal psychrophilic euglenoidEutreptiella pomquetensis
Source: PeerJ journal article supplement (doi:10.7717/peerj.3725), 2017-08-25

**A**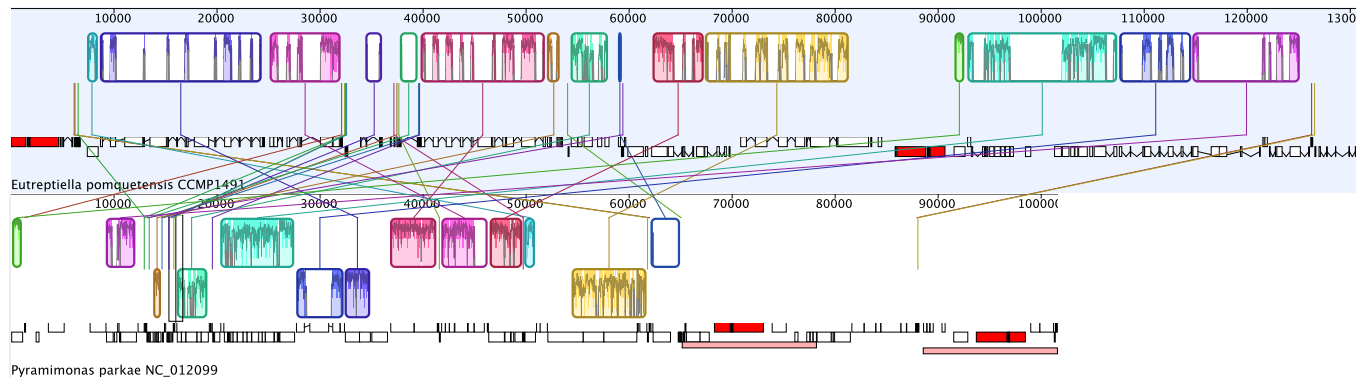**B**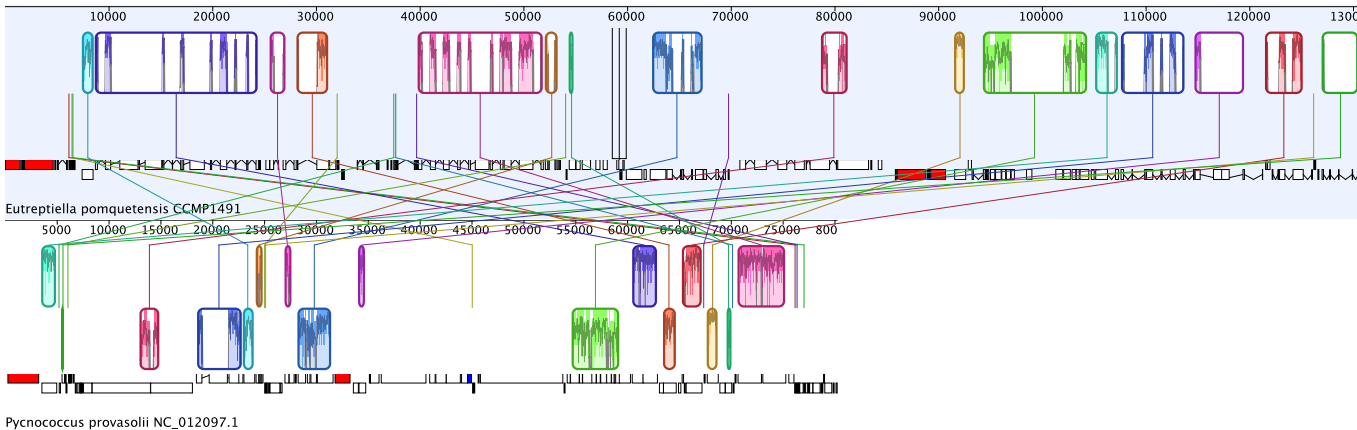**C**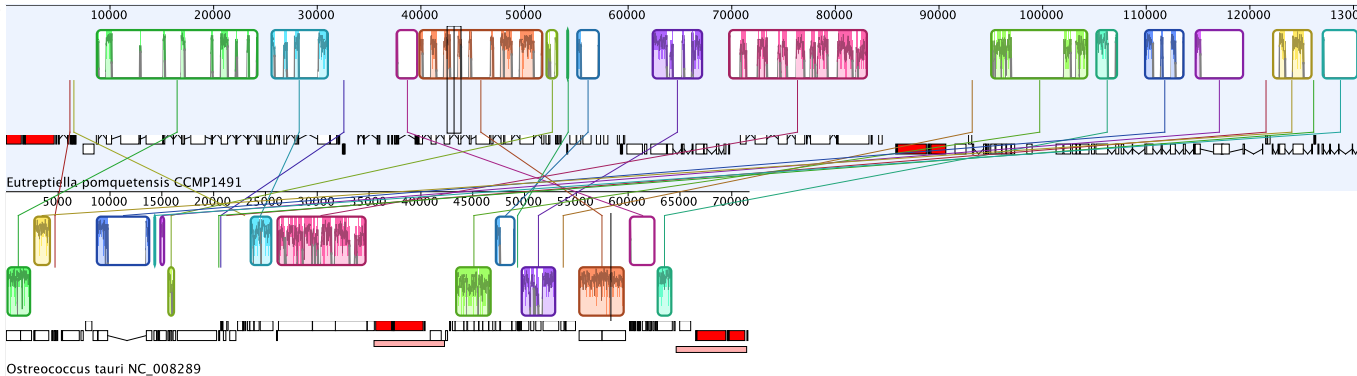

Supplement: Figure_S2.pdf [file Figure_S2.pdf]
