# Supplementary material for: Chloroplast genome expansion by intron multiplication in the basal psychrophilic euglenoid Eutreptiella pomquetensis
Source: PubMed Central journal article supplement (PMC5572947; doi:10.7717/peerj.3725), 2017-08-25

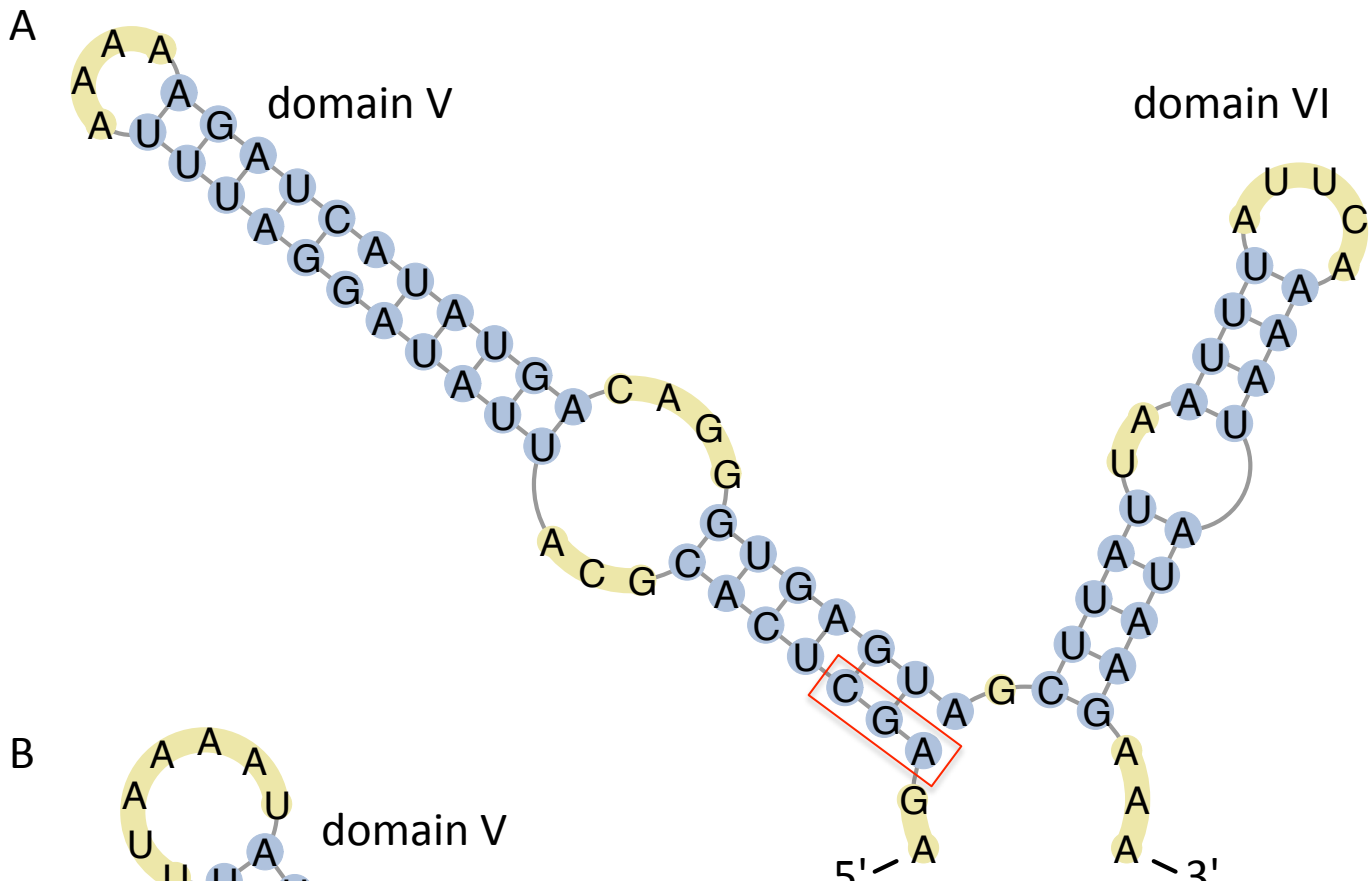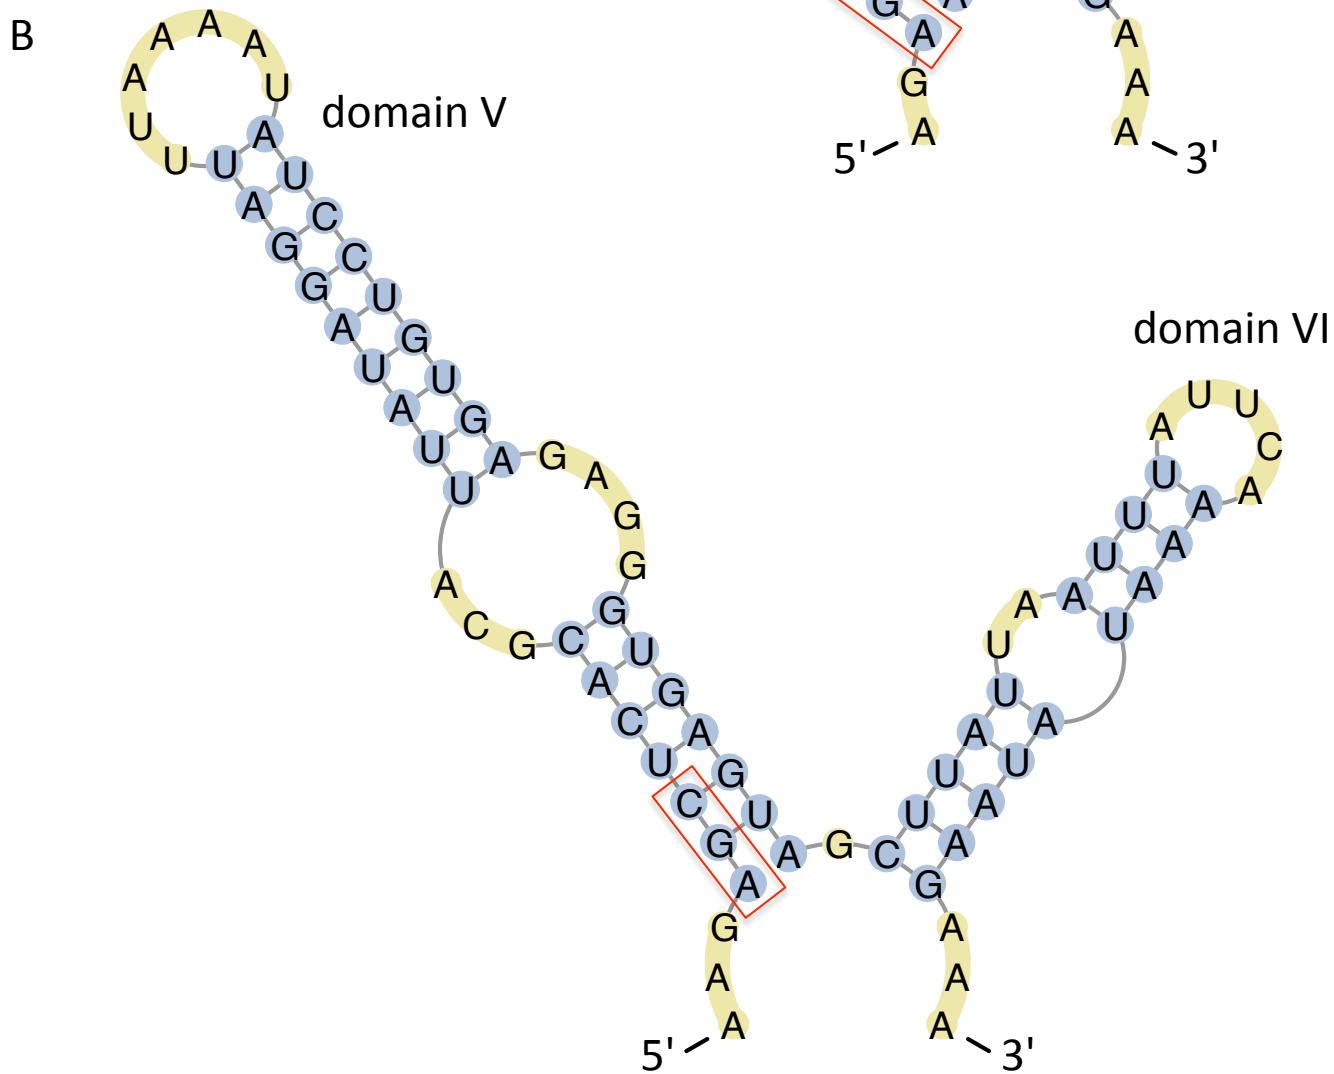

Supplement: peerj-05-3725-s005.pdf [file peerj-05-3725-s005.pdf]
