# Supplementary material for: Chloroplast genome expansion by intron multiplication in the basal psychrophilic euglenoid Eutreptiella pomquetensis
Source: PeerJ. 2017 Aug 25;5:e3725. doi: 10.7717/peerj.3725 (PMC5572947; doi:10.7717/peerj.3725)
Supplement: Table S2 [file peerj-05-3725-s008.xlsx]

## Sheet: Tabelle3
gene	intron	start	stop	length	GC content (%)	insertion site	additional GTGCG	insertion additional GTGCG (nt)	repeated 3' motifs
atpB	1	GTGCG	ACGTTCAT	803	37.5	70			TTAATTTATTCAAAATATAAGAAA *
	2	GTGCG	ACGTTCAT	776	36.2	1061	1	261	ATAATTCGGCAAAATATATTAGA ***
	3	GTGCG	ACGTTCAT	787	37.7	2309	1	261	TTCGGTTGTATACTACCAGAAGAAA **
	4	GTGCG	ACGTTCAT	791	35.5	3209	1	261
atpE	1	GTGCG	AGTTTAAC	1173	34.3	136			AAGAAATGTTTTACTTTAGA ****
	2	GTGCG	ACGTTCAT	829	36.9	1347	1	261
atpF	1	GTGCG	CCTAACCA	814	29.4	21	2	29/79
atpH	1	GTGCG	ACGTTCAT	775	36.8	88	1	261
petB	1	GTGTG	TACCTGAC	1736	32.5	23	2	671/ 931
	2	GTGCG	ACTTTCAT	4128	30.6	1898	2	784/ 2937	AAGAAATGTTTTACTTTAGA ****
petG	1	GTGCG	ACGTTCATCAT	1578	36.4	49	4	261/777/1057
psaA	1	GTGCG	ACGTTCAT	827	36.9	343	1	261
	2	GTGCG	ACGTTCAT	774	37.6	1654	1	261
	3	GTGCG	ACGTTCAT	823	36.8	2977	1	261
	4	GTGCG	ACGTTCAT	809	36.6	4048	1	261
	5	GTGCG	AATTTAAC	1908	28	5030
	6	GTGCG	ACGTTCAT	773	37	7147	1	261
psaB	1	GTGCG	ACGTTCAT	786	34.6	669
	2	GTGCG	ACGTTCAT	781	36.2	2772	1	261
psaC	1	GTGCG	CCGAGTTT	576	26.7	42	2	3/334
	2	GTGCG	TACCTAAC	1294	34.2	649	2	282/ 540
	3	GTGCG	ACGTTCAT	827	35.6	1957	1	261
	4	GTGCG	AGTTTAAT	619	28.3	2809
psbB	1	GTGCG	ATCCATAT	837	25.8	20
	2	GTGCG	ACGTTCAT	775	38.2	1849	1	261
psbC	1	GTGCG	AGTTTAAG	2580	29.1	154	3	45/ 2420/ 2554
	2	GTGCG	TTCACCTA	844	36.1	2847	1	259	TTAATTTATTCAAAATATAAGAAA *
	3	GTGCG	ACGTTCAT	788	36.7	4310	1	261	ATAATTCGGCAAAATATATTAGA ***
	4	TTGCG	ACGCTCAT	1029	38.7	5199	1	955
	5	GTGCG	ACGTTCAT	787	37.1	6347	1	261	ATAATTCGGCAAAATATATTAGA ***
psbD	1	GTGCG	ACGTTCAT	778	36.5	192	1	261	ATAATTCGGCAAAATATATTAGA ***
	2	GTGCG	AGTTTAAC	2744	35.5	970	1	1176	AAGAAATGTTTTACTTTAGA ****
	3	GTGCG	ACTTTCAT	2235	29.1	4248	1	421
	4	GTGCG	ACGTTCAT	818	36.1	6604	1	259	TTAATTTATTCAAAATATAAGAAA *
	5	GTGCG	ACGTTCAT	778	36.5	7445	1	261	ATAATTCGGCAAAATATATTAGA ***
psbK	1	GTATG	ATAACGAT	504	22.8	33
	2	GTGTG	AGTTTACG	1255	33.2	592	2	115/ 347
psbT	1	GTGCG	TACTCAAT	497	29	25
rbcL	1	GTGCG	ACGTTCAT	774	37.5	290	1	261
rpl32	1	GTGCG	ACGTTCAT	791	36.5	92	1	261	ATAATTCGGCAAAATATATTAGA *** TTCGGTTGTATACTACCAGAAGAAA **
rpoB	1	GTGCG	ACGTTCAT	866	36.3	555	1	261	TTAATTTATTCAAAATATAAGAAA *
	2	GTGCG	AGTTTAAC	1112	35.1	2550
	3	GTGCG	ACGTTCAT	774	36.6	4523
rpoC1	1	GTAAA	CAGAAGCC	356	28.9	12
	2	GTGTG	GACCACTA	654	31	2245
rps12	1	GTGCG	ACGTTCAT	793	36.9	362	1	261
rps14	1	GTAAG	ATTTAACC	962	26.8	177
rps2	1	GTGCG	ATCCAGGG	491	28.3	112
	2	GTGTA	ACCTACCA	921	24.6	840			AAAATAATATTTTTATATTTTGTT
rps7	1	GTGCG	ACGTTCAT	789	36.4	261	1	261	ATAATTCGGCAAAATATATTAGA ***
tufA	1	GTGCG	AGTTTCAC	1829	33.1	75	1	626
